# Supplementary material for: Physiological Roles and Mechanisms of Action of Class I TCP Transcription Factors
Source: MDPI journal article supplement (doi:10.3390/ijms24065437), 2023-03-12
Supplement: s1 [file s1]

**Table S1. A summary of processes affected by class I TCPs and their interacting partners.** See text for details. Abbreviations are as mentioned in text.

| TCP                                                | Interacting protein | Type                                 | Effect of the interaction                | Process                             | Organism                    | Reference               |
|----------------------------------------------------|---------------------|--------------------------------------|------------------------------------------|-------------------------------------|-----------------------------|-------------------------|
| AtTCP14<br>AtTCP15<br>AtTCP22                      | DA1<br>DAR1<br>DAR2 | ubiquitin receptor                   | TCP degradation                          | cell proliferation                  | <i>Arabidopsis thaliana</i> | (52)<br>(127)           |
| AtTCP15                                            | ERF4                | transcription factor                 | inhibits TCP transcriptional activity    | cell cycle regulation               | <i>Arabidopsis thaliana</i> | (78)                    |
| AtTCP15                                            | PIF4                | transcription factor                 | increases binding to target genes        | cell expansion, thermomorphogenesis | <i>Arabidopsis thaliana</i> | (62)                    |
| AtTCP14<br>AtTCP15                                 | DELLAs              | transcriptional repressors           | inhibits TCP transcriptional activity    | germination, stem growth            | <i>Arabidopsis thaliana</i> | (51) (56)               |
| AtTCP14                                            | DOF6                | transcription factor                 | non tested                               | germination                         | <i>Arabidopsis thaliana</i> | (72)                    |
| AtTCP14                                            | MPK8                | MAP kinase                           | increases TCP transcriptional activity   | germination                         | <i>Arabidopsis thaliana</i> | (55)                    |
| AtTCP15                                            | GLK1                | transcription factor                 | increases binding to target genes        | cotyledon development               | <i>Arabidopsis thaliana</i> | (66)                    |
| AtTCP14                                            | ORANGE              | DnaJ-like zinc finger domain protein | inhibits TCP transcriptional activity    | greening                            | <i>Arabidopsis thaliana</i> | (97)                    |
| AtTCP15                                            | MYB106              | transcription factor                 | Non tested                               | epidermis development               | <i>Arabidopsis thaliana</i> | (79)                    |
| AtTCP7                                             | NF-Ys               | transcription factor                 | increases binding to target genes        | flowering                           | <i>Arabidopsis thaliana</i> | (61)                    |
| AtTCP7                                             | CO                  | transcription factor                 | non tested                               | flowering                           | <i>Arabidopsis thaliana</i> | (61)                    |
| AtTCP7<br>AtTCP14<br>AtTCP15<br>AtTCP22<br>AtTCP23 | FT                  | transcription factor                 | non tested                               | flowering                           | <i>Arabidopsis thaliana</i> | (84)                    |
| AtTCP22<br>AtTCP23                                 | NF-Ys               | transcription factor                 | non tested                               | flowering                           | <i>Arabidopsis thaliana</i> | (83)                    |
| AtTCP22                                            | CRY2                | blue light receptor                  | increases binding to target genes        | circadian clock regulation          | <i>Arabidopsis thaliana</i> | (99)                    |
| AtTCP22                                            | PPK1                | protein kinase                       | increases binding to target genes        | circadian clock regulation          | <i>Arabidopsis thaliana</i> | (99)                    |
| AtTCP20<br>AtTCP21<br>AtTCP22                      | LWD1                | WD repeat-containing protein         | increases transcriptional activity       | circadian clock regulation          | <i>Arabidopsis thaliana</i> | (88)<br>(99)            |
| AtTCP20                                            | NLP6<br>NLP7        | transcription factor                 | increases TCP transcriptional activity   | nitrate signaling                   | <i>Arabidopsis thaliana</i> | (102)                   |
| AtTCP20                                            | HBI1                | transcription factor                 | increases TCP transcriptional activity   | nitrate signaling                   | <i>Arabidopsis thaliana</i> | (104)                   |
| AtTCP14<br>AtTCP15                                 | SPINDLY             | O-fucosyltransferase                 | prevents TCP proteolysis                 | CK signaling                        | <i>Arabidopsis thaliana</i> | (128)<br>(129)<br>(130) |
| MdTCP46                                            | MdABI5              | transcription factor                 | represses MdABI5 binding to target genes | ABA response                        | <i>Malus domestica</i>      | (24)                    |
| AaTCP14<br>AaTCP15                                 | AaORA               | transcription factor                 | increases TCP transcriptional activity   | artemisinin biosynthesis            | <i>Artemisia Annua</i>      | (81)<br>(82)            |

|                              |        |                                                               |                                          |                          |                             |       |
|------------------------------|--------|---------------------------------------------------------------|------------------------------------------|--------------------------|-----------------------------|-------|
| AaTCP14                      | AaJAZ8 | JAZ protein                                                   | represses TCP transcriptional activity   | artemisinin biosynthesis | <i>Artemisia Annua</i>      | (82)  |
| AtTCP14<br>AtTCP15           | MOS1   | HLA-B ASSOCIATED TRANSCRIPT2 (BAT2) domain-containing protein | increases binding to TCP target genes    | plant immunity           | <i>Arabidopsis thaliana</i> | (53)  |
| AtTCP15                      | NPR1   | transcriptional cofactor                                      | increases binding to target genes        | plant immunity           | <i>Arabidopsis thaliana</i> | (92)  |
| AtTCP8<br>AtTCP14<br>AtTCP15 | SRFR1  | tetratricopeptide (TPR) protein                               | non tested                               | plant immunity           | <i>Arabidopsis thaliana</i> | (107) |
| AtTCP8<br>AtTCP14<br>AtTCP15 | ZRKs   | kinase                                                        | non tested                               | plant immunity           | <i>Arabidopsis thaliana</i> | (111) |
| AtTCP14                      | HopBB1 | bacterial type III effector                                   | TCP degradation                          | plant immunity           | <i>Arabidopsis thaliana</i> | (114) |
| AtTCP21                      | NSs    | viral pathogen effector                                       | inhibits phytohormone receptors function | plant immunity           | <i>Arabidopsis thaliana</i> | (120) |
| AtTCP21                      | Tsw    | immune receptor                                               | immune effector recognition              | plant immunity           | <i>Arabidopsis thaliana</i> | (120) |
